# Supplementary material for: A copper-based 2D hybrid perovskite solar absorber as a potential eco-friendly alternative to lead halide perovskites
Source: Royal Society of Chemistry journal article supplement (doi:10.1039/d1tc05047h), 2022-01-01
Supplement: d1tc05047h1.pdf [file d1tc05047h1.pdf]

## Supporting Information for: A Copper-Based 2D Hybrid Perovskite Solar Absorber as a Potential Eco-Friendly Alternative to Lead Halide Perovskites

*Intissar Hamdi,<sup>a†</sup> Yeasin Khan,<sup>b,ct</sup> Fatma Aouaini,<sup>d</sup> Jung Hwa Seo,<sup>b</sup> Hyun-Joo Koo,<sup>c</sup> Mark M. Turnbull,<sup>e</sup> Bright Walker<sup>\*c</sup> and Houcine Nâïli<sup>\*a</sup>*

<sup>a</sup> *Laboratory of Physico Chemistry of the Solid State, Department of Chemistry, Faculty of Sciences of Sfax, Sfax University, Tunisia.*

<sup>b</sup> *Department of Materials Physics, Dong-A University, Busan, 49315, Republic of Korea.*

<sup>c</sup> *Department of Chemistry, Kyung Hee University, Seoul, 02447, Republic of Korea.*

<sup>d</sup> *Physics Department, College of Science, Princess Nourah bint Abdulrahman University, P.O. Box 84428, Riyadh 11671, Saudi Arabia.*

<sup>e</sup> *Carlson School of Chemistry and Biochemistry, Clark University, Worcester, MA 01610, USA.*

### Contents:

**Figure S1.** Fragment of the structure, showing the C/N-H...Cl hydrogen bonds for one orientation of the disordered 2(aminomethyl) pyridinium cation.

**Figure S2.** UV-vis absorption spectra of AMP[CuCl<sub>4</sub>] (a) film (b) solution.

**Figure S3.** Specular reflectance spectra of AMP[CuCl<sub>4</sub>].

**Figure S4.** Absorption coefficient as a function of wavelength for AMP[CuCl<sub>4</sub>].

**Figure S5.** Out-of-phase combinations of the Cu  $x^2-y^2$  and Cl p orbitals in the up-spin and down-spin states of a square planar CuCl<sub>4</sub> unit.

**Figure S6.** Band dispersion diagram. Red lines correspond to down spins, while black lines correspond to up spins.

**Tables S1.** Selected bond distances (Å) and angles (°) for AMP[CuCl<sub>4</sub>].

**Table S2.** Hydrogen-bond geometry (Å, °).

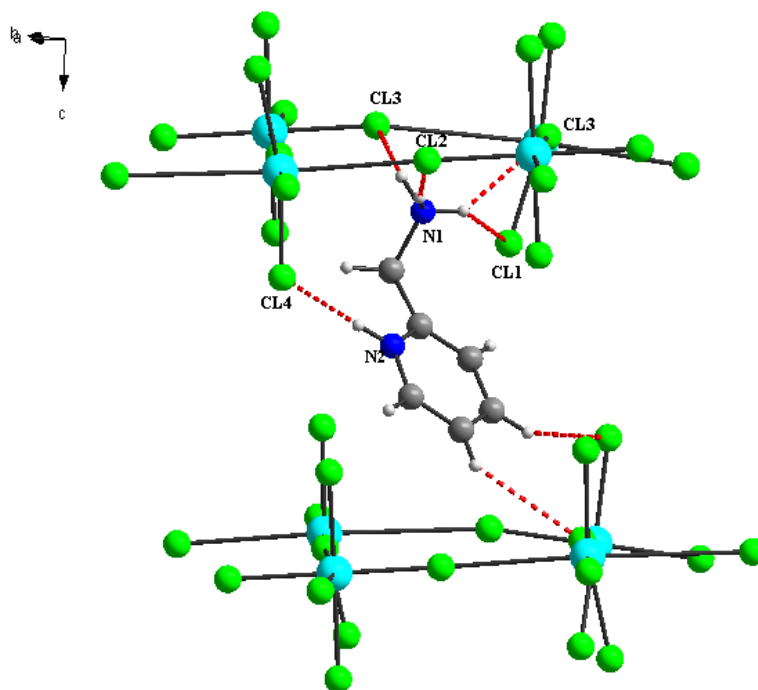

**Figure S1.** Fragment of the crystal structure, showing the C/N-H...Cl hydrogen bonds for one orientation of the disordered 2-(aminomethyl) pyridinium cation.

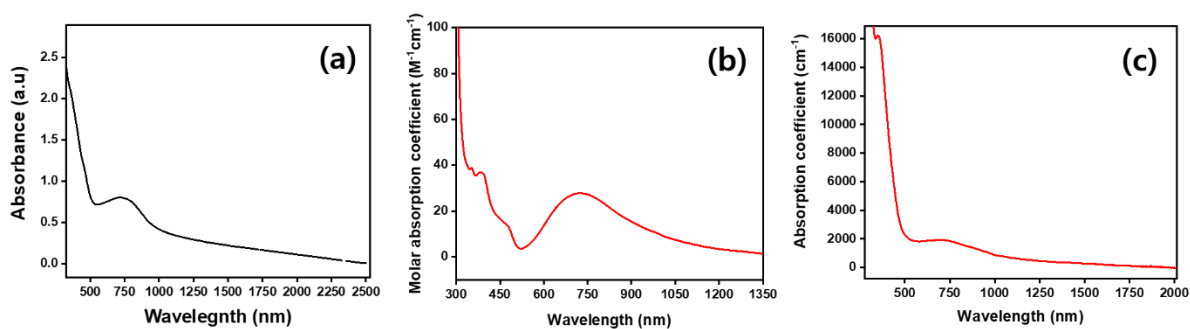

**Figure S2.** UV-vis absorption spectra of AMP[CuCl<sub>4</sub>] (a) film (b) molar absorption coefficient vs wavelength, (c) absorption coefficient vs wavelength.

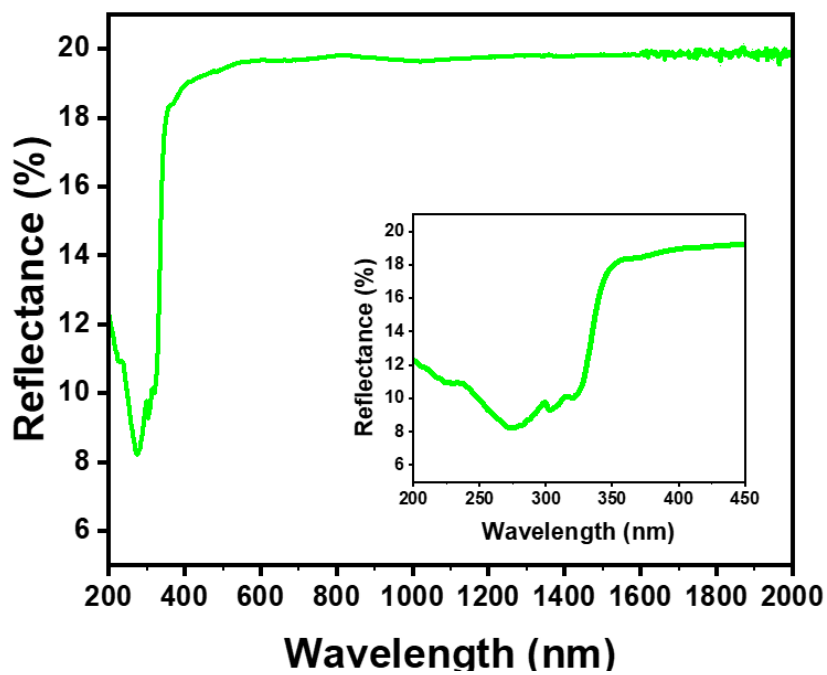

**Figure S3.** Specular reflectance of AMP[CuCl<sub>4</sub>].

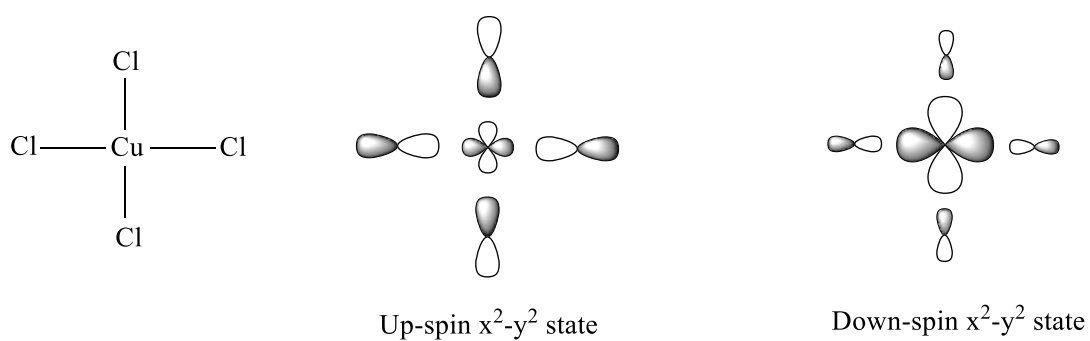

**Figure S4.** Out-of-phase combinations of the Cu  $x^2-y^2$  and Cl p orbitals in the up-spin and down-spin states of a square planar CuCl<sub>4</sub> unit.

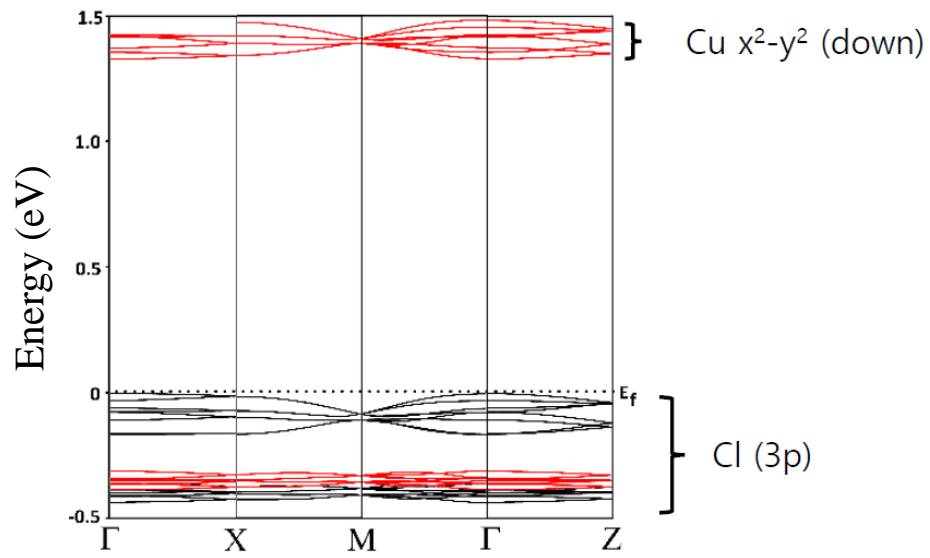

**Figure S5.** Band dispersion diagram. Red lines correspond to down spins, while black lines correspond to up spins.

**Table S1.** Selected bond distances (Å) and angles (°) for AMP[CuCl<sub>4</sub>]

| <b>Within the inorganic moiety</b> |             | <b>Within the organic moiety</b> |          |
|------------------------------------|-------------|----------------------------------|----------|
| Cu - Cl1                           | 2.2705 (12) | N2-C6                            | 1.338(5) |
| Cu - Cl2                           | 2.2871 (12) | C1-N1                            | 1.480(5) |
| Cu - Cl3                           | 2.2872 (11) | C1-C2                            | 1.505(6) |
| Cu - Cl4                           | 2.2881 (12) | C2-N2                            | 1.338(5) |
| Cl1 – Cu - Cl3                     | 90.09 (4)   | C2-C3                            | 1.368(6) |
| Cl2 – Cu - Cl1                     | 90.72(4)    | C3-C4                            | 1.383(6) |
| Cl2 – Cu - Cl3                     | 177.13(4)   | C5-C6                            | 1.362(6) |
| Cl2 – Cu - Cl4                     | 90.74(4)    | C4-C5                            | 1.381(6) |
| Cl4 – Cu - Cl1                     | 168.86(4)   | C6-N2                            | 1.338(5) |
|                                    |             | N1-C1-C2                         | 112.5(3) |
|                                    |             | N2-C2-C3                         | 118.7(4) |
|                                    |             | N2-C2-C1                         | 116.8(4) |
|                                    |             | N2-C6-C5                         | 119.9(4) |
|                                    |             | C3-C2-C1                         | 124.5(4) |
|                                    |             | C2-C3-C4                         | 120.2(4) |
|                                    |             | C5-C4-C3                         | 119.1(4) |
|                                    |             | C6-C5-C4                         | 119.3(4) |

**Table S2.** Hydrogen-bond geometry (Å, °)

| <i>D</i> —H... <i>A</i>              | <i>D</i> —H | H... <i>A</i> | <i>D</i> ... <i>A</i> | <i>D</i> —H... <i>A</i> |
|--------------------------------------|-------------|---------------|-----------------------|-------------------------|
| N1—H1 <i>A</i> ...Cl3 <sup>i</sup>   | 0.99 (5)    | 2.26 (5)      | 3.152 (4)             | 150 (4)                 |
| N1—H1 <i>B</i> ...Cl2 <sup>ii</sup>  | 0.84 (4)    | 2.40 (5)      | 3.225 (4)             | 171 (4)                 |
| N1—H1 <i>C</i> ...Cl1 <sup>iii</sup> | 0.91 (4)    | 2.78 (4)      | 3.400 (4)             | 127 (3)                 |
| N1—H1 <i>C</i> ...Cl3 <sup>iii</sup> | 0.91 (4)    | 2.43 (4)      | 3.174 (4)             | 140 (4)                 |
| C1—H2 <i>A</i> ...Cl2                | 0.99        | 2.92          | 3.611 (4)             | 127                     |
| C1—H2 <i>B</i> ...Cl1 <sup>iii</sup> | 0.99        | 2.95          | 3.544 (4)             | 119                     |
| C3—H4...Cl1 <sup>iii</sup>           | 0.95        | 2.88          | 3.703 (4)             | 145                     |
| C5—H6...Cl2 <sup>iv</sup>            | 0.95        | 2.91          | 3.738 (5)             | 146                     |
| C5—H6...Cl3 <sup>v</sup>             | 0.95        | 2.83          | 3.505 (4)             | 129                     |
| C6—H7...Cl1 <sup>iv</sup>            | 0.95        | 2.63          | 3.564 (4)             | 167                     |
| N2—H8...Cl4                          | 0.90 (4)    | 2.17 (4)      | 3.060 (4)             | 171 (4)                 |
| N1—H1 <i>A</i> ...Cl3 <sup>i</sup>   | 0.99 (5)    | 2.26 (5)      | 3.152 (4)             | 150 (4)                 |
| N1—H1 <i>B</i> ...Cl2 <sup>ii</sup>  | 0.84 (4)    | 2.40 (5)      | 3.225 (4)             | 171 (4)                 |
| N1—H1 <i>C</i> ...Cl1 <sup>iii</sup> | 0.91 (4)    | 2.78 (4)      | 3.400 (4)             | 127 (3)                 |
| N1—H1 <i>C</i> ...Cl3 <sup>iii</sup> | 0.91 (4)    | 2.43 (4)      | 3.174 (4)             | 140 (4)                 |
| C1—H2 <i>A</i> ...Cl2                | 0.99        | 2.92          | 3.611 (4)             | 127                     |
| C1—H2 <i>B</i> ...Cl1 <sup>iii</sup> | 0.99        | 2.95          | 3.544 (4)             | 119                     |
| C3—H4...Cl1 <sup>iii</sup>           | 0.95        | 2.88          | 3.703 (4)             | 145                     |
| C5—H6...Cl2 <sup>iv</sup>            | 0.95        | 2.91          | 3.738 (5)             | 146                     |
| C5—H6...Cl3 <sup>v</sup>             | 0.95        | 2.83          | 3.505 (4)             | 129                     |
| C6—H7...Cl1 <sup>iv</sup>            | 0.95        | 2.63          | 3.564 (4)             | 167                     |
| N2—H8...Cl4                          | 0.90 (4)    | 2.17 (4)      | 3.060 (4)             | 171 (4)                 |

**Symmetry codes:** (i)  $-x+1, y-1/2, -z+3/2$ ; (ii)  $-x+1, y+1/2, -z+3/2$ ; (iii)  $x+1/2, y, -z+3/2$ ; (iv)  $x, -y+3/2, z-1/2$ ; (v)  $-x+1, -y+2, -z+1$ .

**Table S3.** Hall effect measurement

|                                                             | Sample 1 | Sample 2 | Sample 3 | Sample 4 | Sample 5 | Average |
|-------------------------------------------------------------|----------|----------|----------|----------|----------|---------|
| Mobility (cm <sup>2</sup> /Vs)                              | 12.44    | 15.63    | 13.10    | 18.45    | 14.41    | 14.81   |
| Bulk concentration<br>(cm <sup>-3</sup> ) x10 <sup>14</sup> | 1.72     | 1.21     | 1.78     | 1.33     | 1.54     | 1.52    |
| Resistivity (ohm cm)<br>x10 <sup>3</sup>                    | 2.92     | 3.29     | 2.6      | 2.54     | 2.81     | 2.85    |
| Applied current<br>(uA)                                     | 0.1      | 0.1      | 0.1      | 0.1      | 0.1      | 0.1     |
| Magnetic field<br>(Tesla)                                   | 0.55     | 0.55     | 0.55     | 0.55     | 0.55     | 0.55    |
